# Supplementary material
Source: Springer Nature journal article supplement (https://www.springermedizin.de/resource/supplementary/12879_2009_1004_MOESM1_ESM.pdf/9442116)

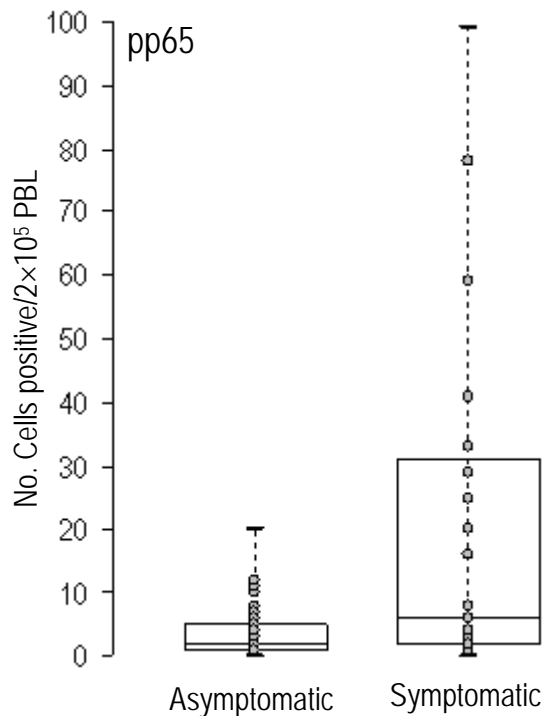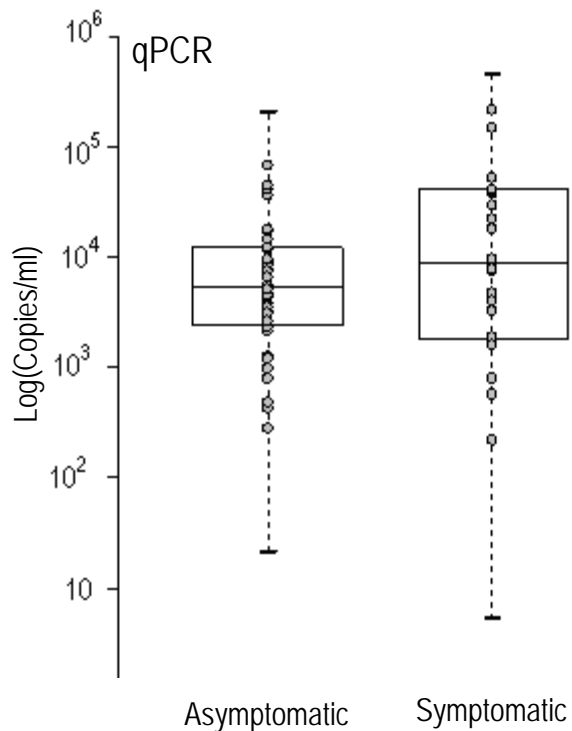

Supplement: MOESM1 [file 9442116]
